# Supplementary material for: A self-assembled peptide mimetic of a tubular host and a supramolecular polymer
Source: Royal Society of Chemistry journal article supplement (doi:10.1039/c6py01955b), 2016-11-21
Supplement: c6py01955b1.pdf [file c6py01955b1.pdf]

## Supporting Information

### Self-assembled peptide mimetic of a tubular host and supramolecular polymer

Arpita Paikar, Apurba Pramanik, Tanmay Das and Debasish Haldar\*

Department of Chemical Sciences, Indian Institute of Science Education and Research  
Kolkata,  
Mohanpur, West Bengal 741252, India,  
E-mail: [deba\\_h76@yahoo.com](mailto:deba_h76@yahoo.com); [deba\\_h76@iiserkol.ac.in](mailto:deba_h76@iiserkol.ac.in)

#### Table of contents

|            |    |
|------------|----|
| Table 1    | 2  |
| Table 2    | 2  |
| Figure S1  | 2  |
| Figure S2  | 3  |
| Figure S3  | 4  |
| Figure S4  | 4  |
| Figure S5  | 5  |
| Table 3    | 5  |
| Figure S6  | 6  |
| Figure S7  | 7  |
| Figure S8  | 8  |
| Figure S9  | 9  |
| Figure S10 | 9  |
| Figure S11 | 10 |
| Figure S12 | 10 |
| Figure S13 | 10 |
| Figure S14 | 11 |
| Figure S15 | 11 |
| Figure S16 | 12 |
| Figure S17 | 12 |
| Figure S18 | 13 |
| Figure S19 | 13 |
| Figure S20 | 14 |
| Figure S21 | 14 |
| Figure S22 | 15 |
| Figure S23 | 15 |
| Figure S24 | 16 |
| Figure S25 | 17 |
| Figure S26 | 18 |
| Figure S27 | 19 |
| Figure S28 | 20 |
| Figure S29 | 20 |
| Figure S30 | 21 |
| Figure S31 | 22 |
| Figure S32 | 23 |
| Figure S33 | 24 |
| Figure S34 | 24 |
| Figure S35 | 25 |

**Table 1.** Selected backbone torsion angles (deg) for peptide **1**

---

|                  | $\phi_1/^\circ$ | $\psi_1/^\circ$ | $\phi_2/^\circ$ | $\psi_2/^\circ$ | $\phi_3/^\circ$ | $\psi_3/^\circ$ |
|------------------|-----------------|-----------------|-----------------|-----------------|-----------------|-----------------|
| Peptide <b>1</b> | 51.73(5)        | 37.20(4)        | 53.99(4)        | 34.05(5)        | -123.61(4)      | 150.14(3)       |

---

**Table 2.** Hydrogen bonding parameters of peptide **1**<sup>a</sup>

---

| D-H...A                  | D..H(Å) | H..A(Å) | D..A(Å)  | D-H..A (°) |
|--------------------------|---------|---------|----------|------------|
| N1-H1....O5 <sup>a</sup> | 0.88    | 2.19    | 3.057(5) | 167        |
| N2-H2....O4 <sup>a</sup> | 0.88    | 2.07    | 2.891(5) | 154        |
| N3-H3...O2               | 0.88    | 2.17    | 2.896(5) | 140        |
| O5-H5...O3               | 0.84    | 2.05    | 2.817(4) | 151        |

---

<sup>a</sup>Symmetry equivalent a: y, 1-x+y, 1/6+z.

---

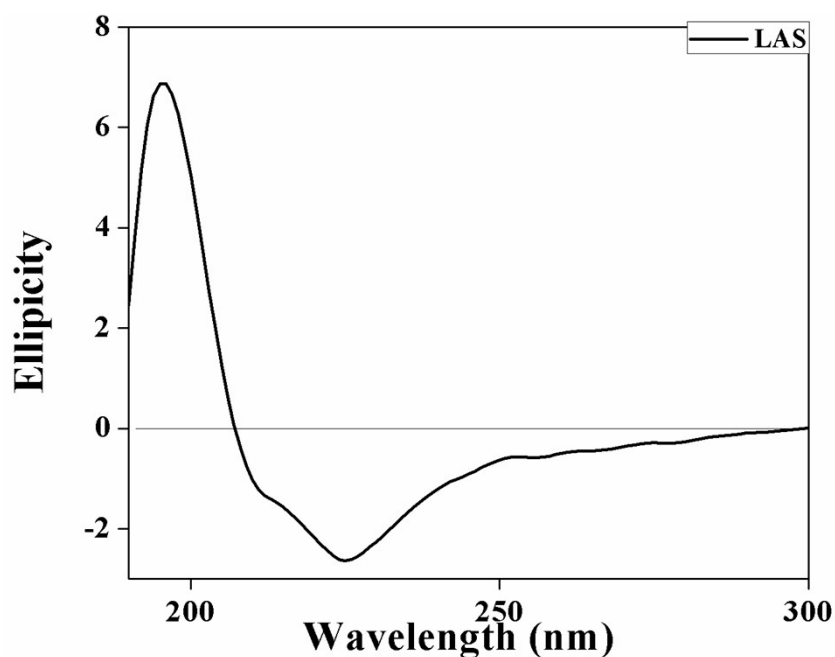

**Figure S1.** The CD spectra of peptide **1**. In MeOH solution peptide **1** self-assembled to form  $\beta$ -turn like conformation. The Peptide concentration was  $1.025 \times 10^{-6}$  (M).

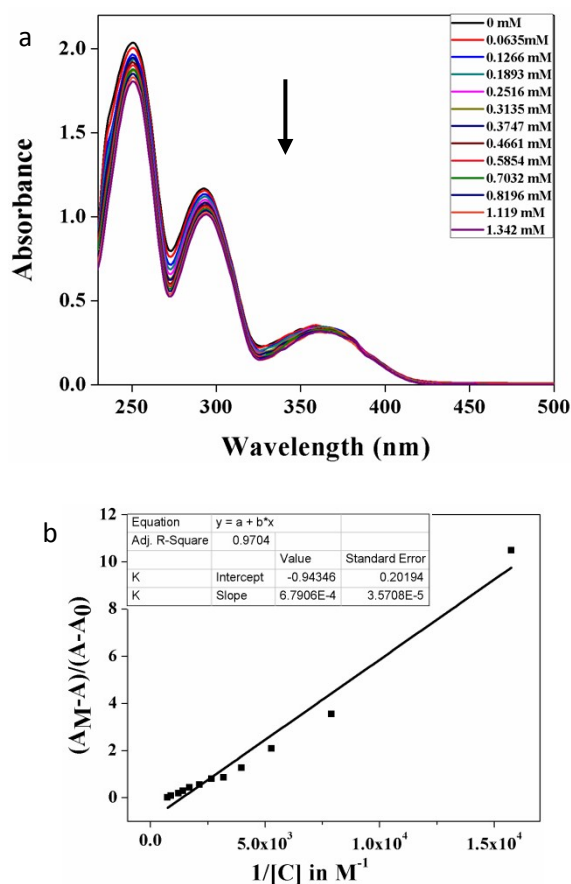

**Figure S2:** (a) UV-vis study of Coumarin derivative **2** with gradual addition of peptide **1**. (b) Bensi-Hildebrand plot.

The binding constant of peptide **1** and coumarin derivative **2** has calculated using the Bensi-Hildebrand equation where the conc of coumarin derivative **2** keep fixed i.e  $1.065 \times 10^{-5}$  M and peptide **1** added gradually to it. The reverse cannot be done as our peptide is not uv active. The absorbance gradually decreases by adding peptide. Here is the equation witten below.

$$1/(A - A_0) = 1/(A_M - A_0) + 1/(A_M - A_0) \cdot 1/[C] \cdot 1/K$$

where  $A_0$  = absorbance of coumarin derivative **2** in absence peptide,  $A$  = absorbance of coumarin derivative **2** in presence peptide,  $A_M$  = maximum absorbance in presence of peptide **1**,  $[C]$  = concentration of peptide **1**,  $K$  = binding constant. Plot of  $(A_M - A)/(A - A_0)$  vs  $1/[C]$  gives a straight with slope  $6.7906 \times 10^{-4}$  i.e.  $1/K$ . So the binding const is  $0.1473 \times 10^4 M^{-1}$ .

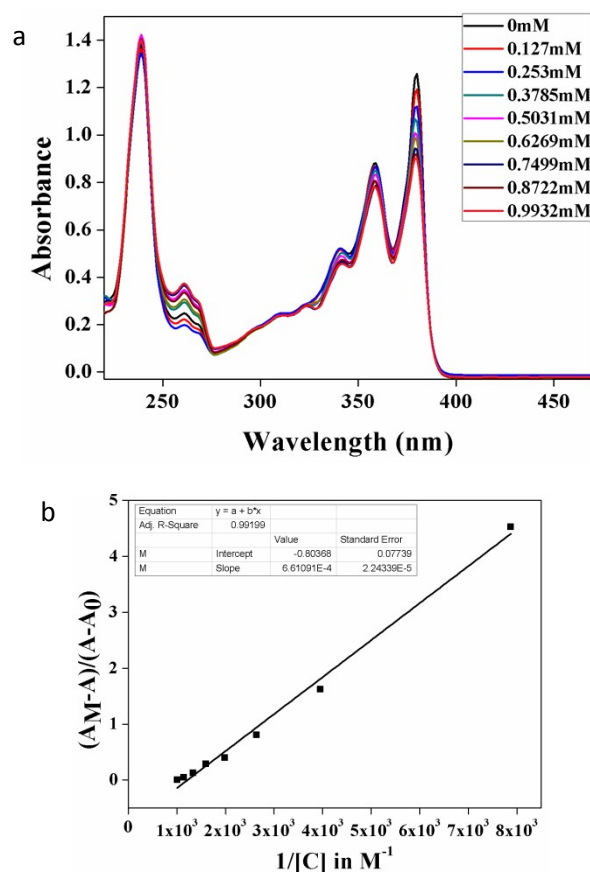

**Figure S3:** (a) UV-vis study of naphthalene diimide **3** with gradual addition of Peptide **1**. (b) Bensi-Hildebrand Plot.

For Bensi-Hildebrand plot, the concentration of NDI derivative **3** keep fixed i.e.  $2.41 \times 10^{-5}$  M and peptide **1** added gradually to it. Plot of  $(A_M - A)/(A - A_0)$  vs  $1/[C]$  gives a straight line with slope  $6.6109 \times 10^{-4}$  i.e.  $1/K$ . So the binding const is  $0.1512 \times 10^4 M^{-1}$ .

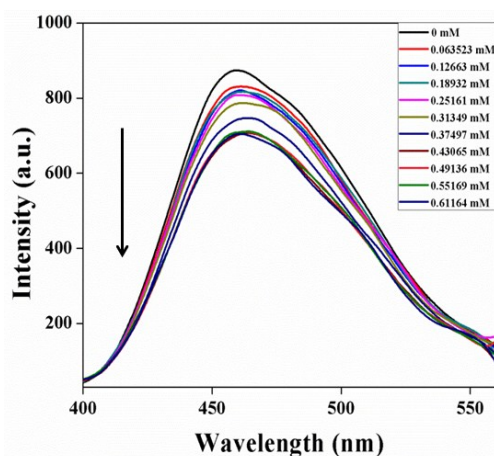

**Figure S4:** Fluorescence spectra of Coumarin derivative **2** with gradual addition of peptide **1**. Excitation at 290 nm.

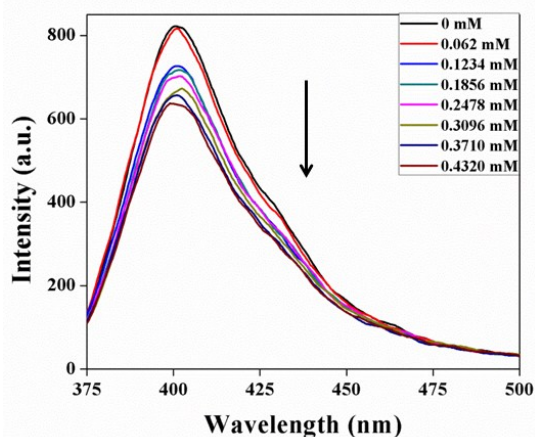

**Figure S5:** Fluorescence spectra of naphthalene diimide **3** with gradual addition of Peptide **1**. Excitation at 360 nm.

**Table 3:** Proton shift table of all NH protons in solvent.

| DMSO- $d_6$<br>Volume<br>added ( $\mu$ l) | Ser- NH | Aib-NH | Leu-NH | OH     |
|-------------------------------------------|---------|--------|--------|--------|
| 0                                         | 7.0615  | 6.7218 | 5.0262 | 4.573  |
| 5                                         | 7.0768  | 6.8192 | 5.0902 | 4.5711 |
| 10                                        | 7.10065 | 6.9852 | 5.2008 | 4.5628 |
| 15                                        | 7.1102  | 7.1779 | 5.3287 | 4.5396 |
| 20                                        | 7.11115 | 7.2314 | 5.3740 | 4.5315 |
| 25                                        | 7.10735 | 7.2944 | 5.4337 | 4.5138 |
| 30                                        | 7.1045  | 7.3211 | 5.4690 | 4.5014 |
| 35                                        | 7.094   | 7.3363 | 5.4909 | 4.4795 |
| 40                                        | 7.0844  | 7.3535 | 5.5138 | 4.4623 |

  

| Proton | $\Delta\delta$ |
|--------|----------------|
| Ser NH | 0.0229         |
| Aib NH | 0.6317         |
| Leu NH | 0.4876         |
| OH     | 0.1107         |

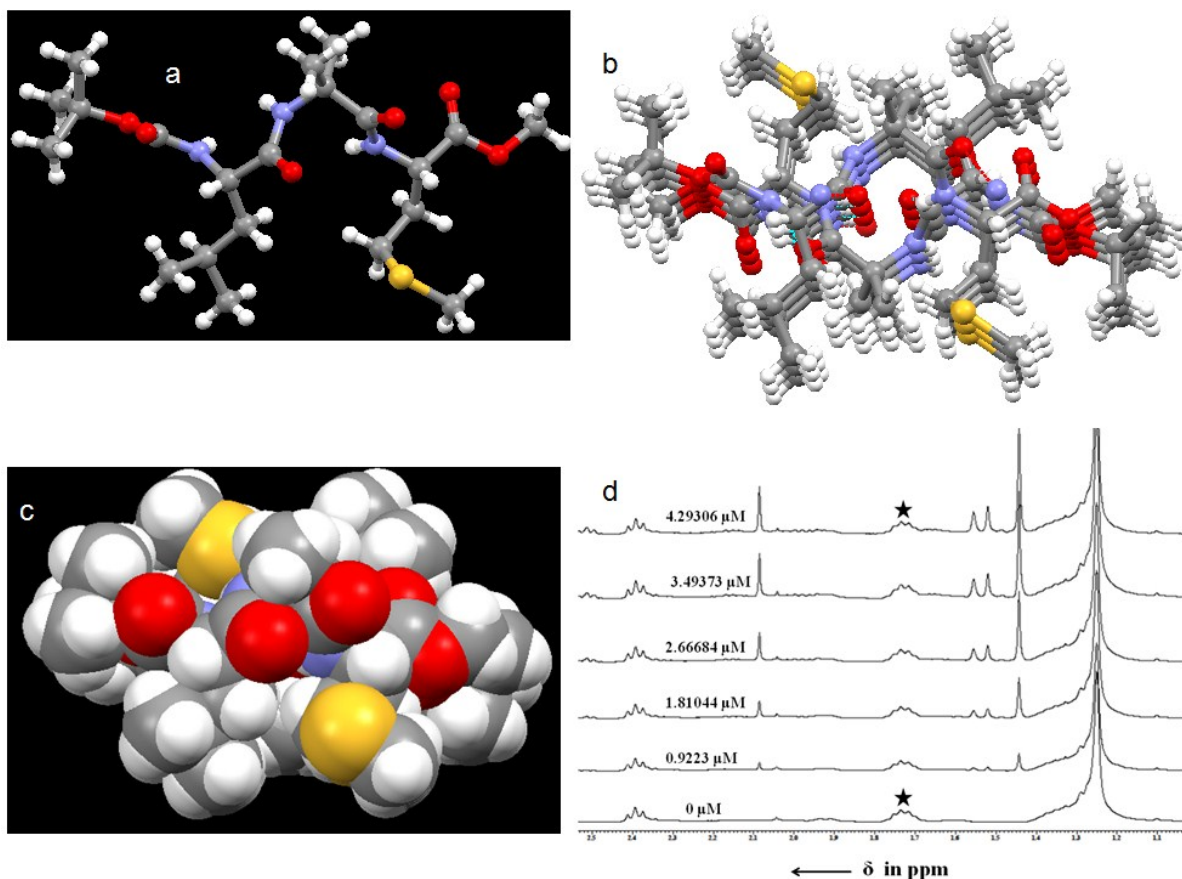

**Figure S6:** (a) the solid state conformation of Boc-Leu-Aib-Met-OMe showing non beta turn structure (CCDC number 1453988). (b) The ball and stick model showing higher order self-assembly of Boc-Leu-Aib-Met-OMe. (c) The space fill model showing non tubular assembly in higher order. (d) Part of  $^1\text{H}$  NMR spectra of coumarin derivative **2** with increasing amount of peptide Boc-Leu-Aib-Met-OMe in  $\text{CDCl}_3$ .

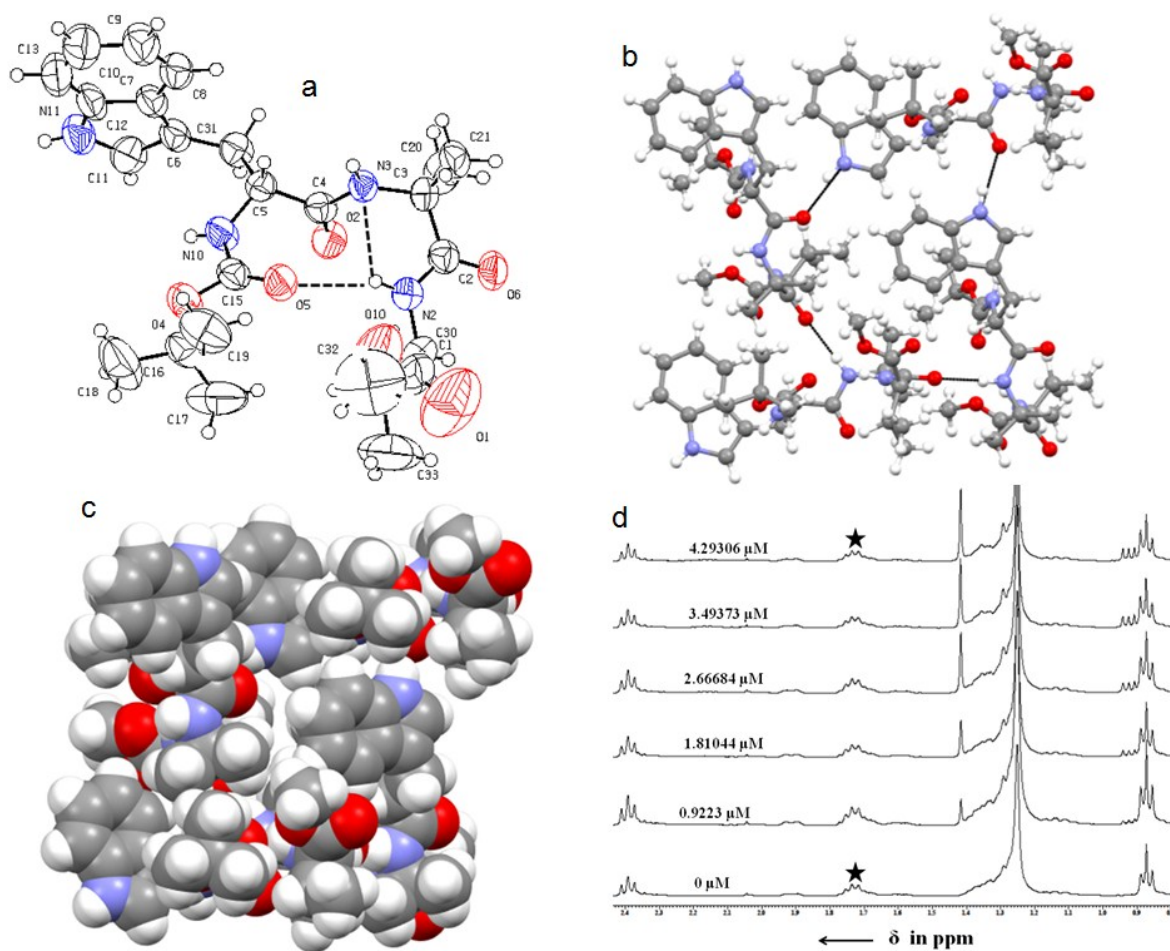

**Figure S7:** (a) the solid state conformation of Boc-Trp-Aib-Val-OMe showing beta turn structure (CCDC number 1426948). (b) The ball and stick model showing higher order cage like assembly of Boc-Trp-Aib-Val-OMe. (c) The space fill model showing cage like assembly in higher order. (d) Part of  $^1\text{H}$  NMR spectra of coumarin derivative **2** with increasing amount of peptide Boc-Trp-Aib-Val-OMe in  $\text{CDCl}_3$ .

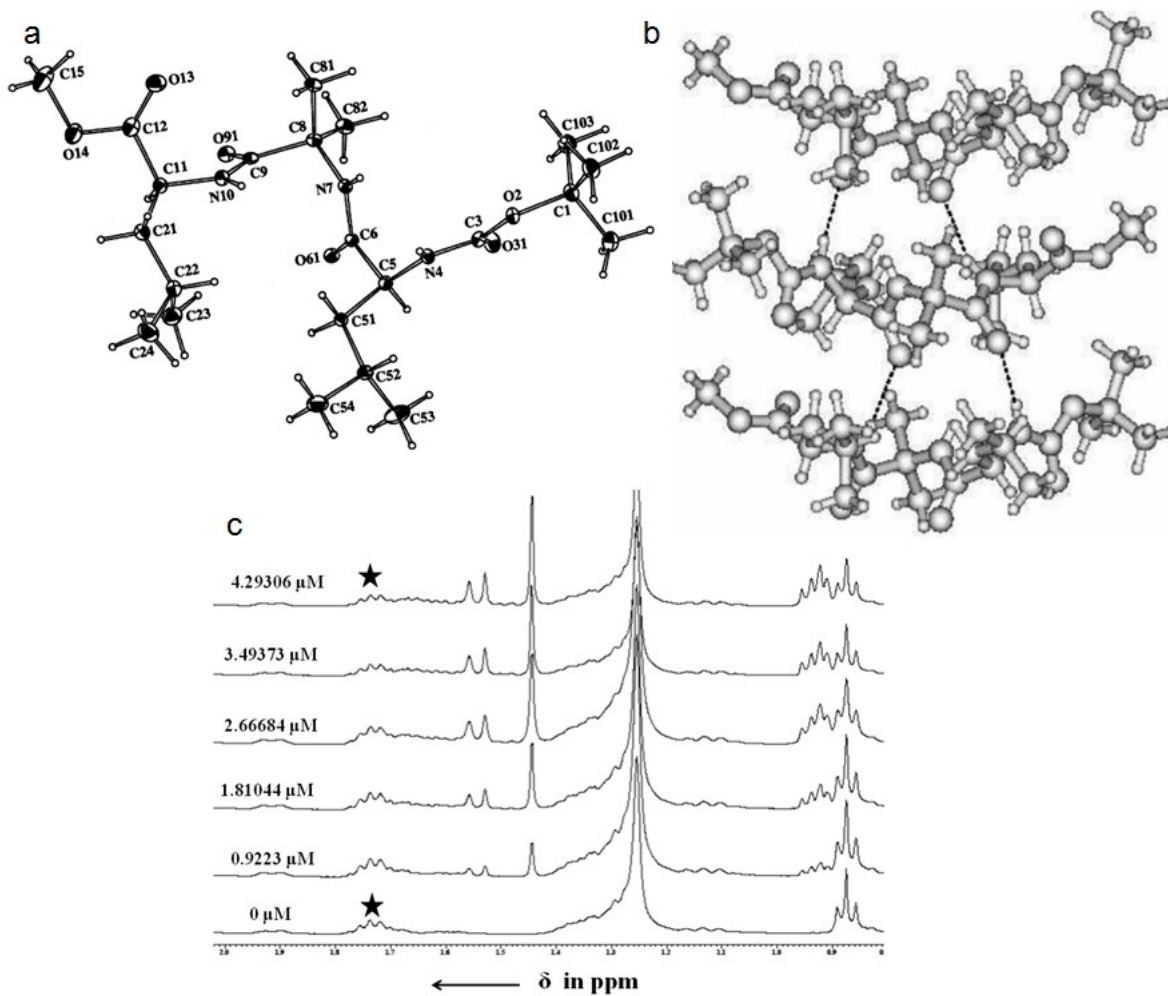

**Figure S8:** (a) the solid state conformation of Boc-Leu-Aib-Leu-OMe showing non beta turn structure (CCDC number 208708). (b) The ball and stick model showing higher order self-assembly of Boc-Leu-Aib-Leu-OMe. (c) Part of <sup>1</sup>H NMR spectra of coumarin derivative **2** with increasing amount of peptide Boc-Leu-Aib-Leu-OMe in CDCl<sub>3</sub>.



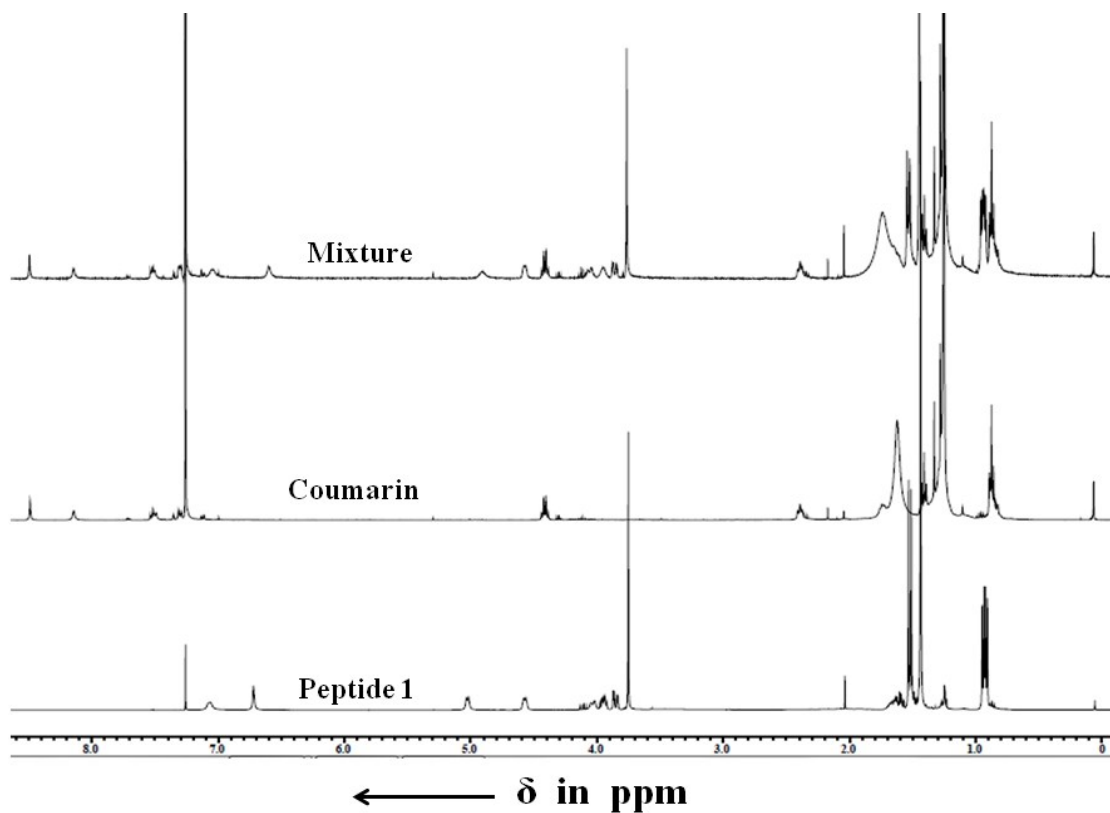

**Figure S9:**  $^1\text{H}$  NMR spectra of mixed crystals obtained from peptide **1** and coumarin derivative **2** showing the existence of both the components.

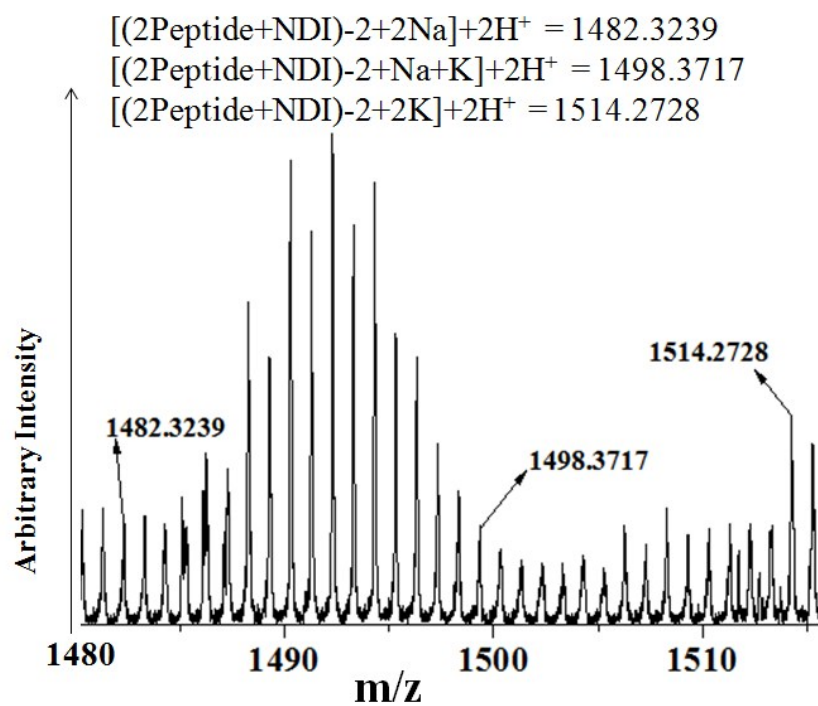

**Figure S10:** Mass spectrum of the fiber obtained from peptide **1** and diimide **3**.

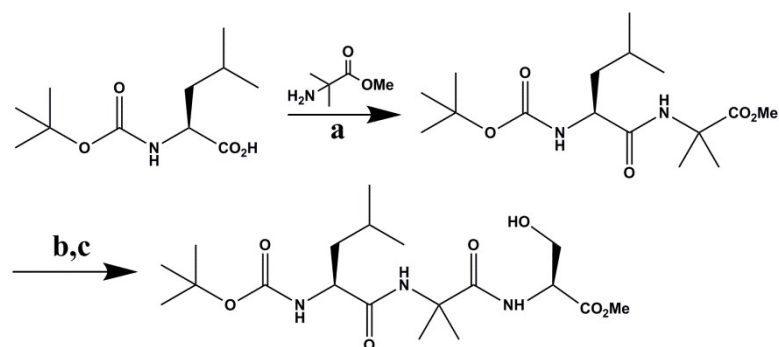

Reagents and conditions: (a) Dry DCM, H-Aib-OMe, DCC, HOBT, 0°C, 77.8% yield; (b) MeOH, 2M NaOH, 86.8% yield; (c) Dry DCM, H-Ser-OMe, DCC, HOBT, 0°C, 78.89% yield.

**Figure S11:** Schematic presentation of synthesis of tripeptide 1

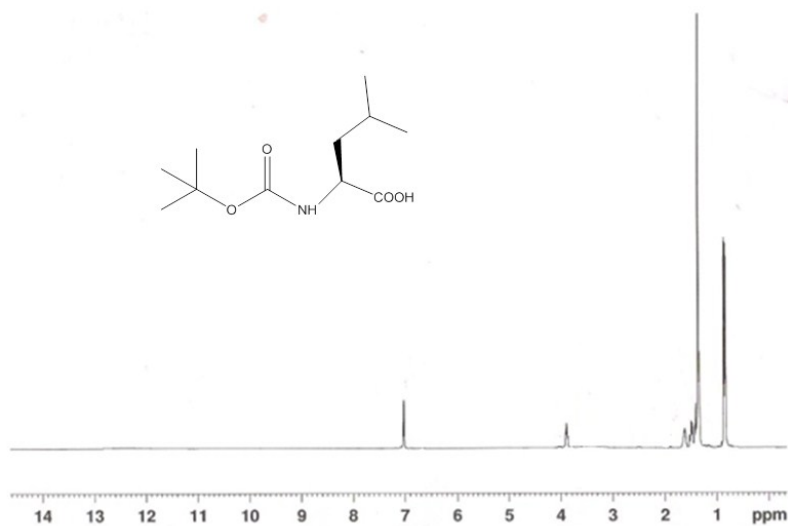

**Figure S12:** <sup>1</sup>H NMR (DMSO-*d*<sub>6</sub>, 500 MHz,  $\delta$  in ppm) spectra of Boc-Leu-OH

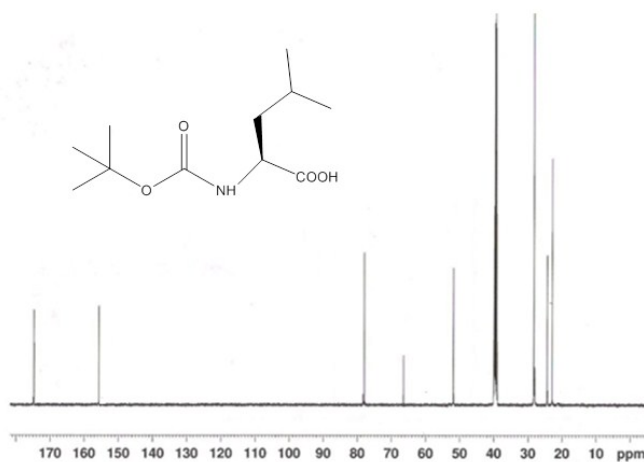

**Figure S13:** <sup>13</sup>C NMR (DMSO-*d*<sub>6</sub>, 125 MHz,  $\delta$  in ppm) spectra of Boc-Leu-OH.

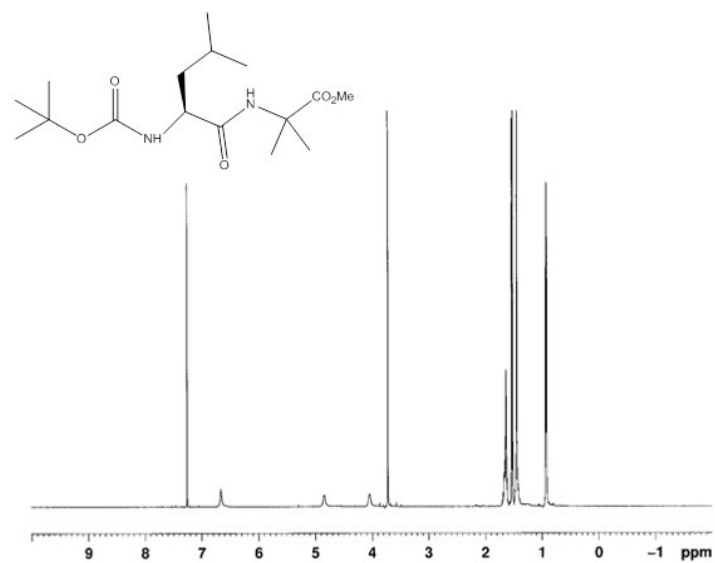

**Figure S14:** <sup>1</sup>H NMR (CDCl<sub>3</sub>, 500 MHz,  $\delta$  in ppm) spectra of Boc-Leu-Aib-OMe

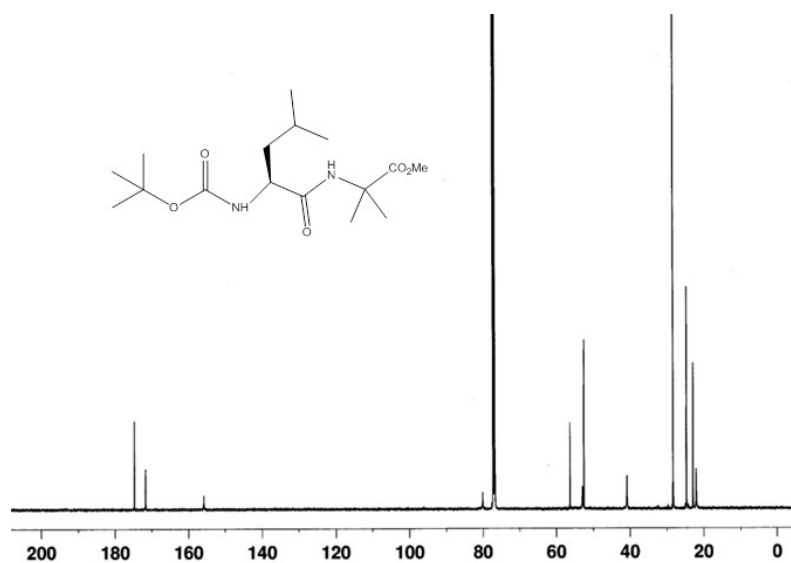

**Figure S15:** <sup>13</sup>C NMR (CDCl<sub>3</sub>, 125 MHz,  $\delta$  in ppm) spectra of Boc-Leu-Aib-OMe

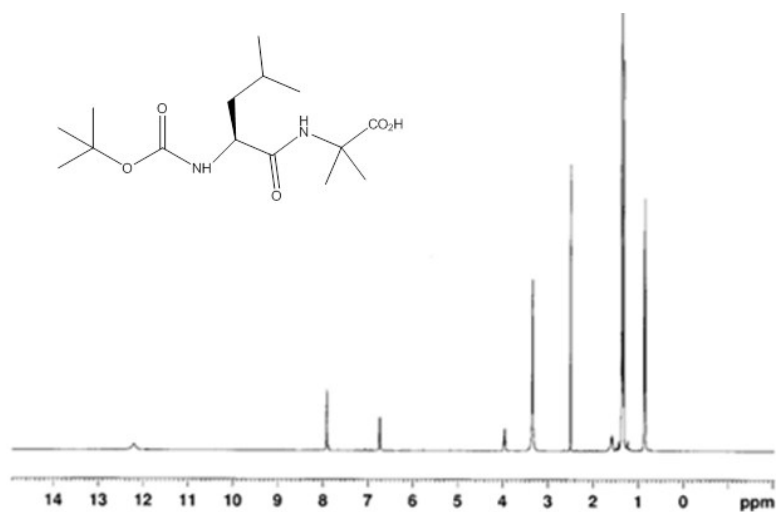

**Figure S16:** <sup>1</sup>H NMR (DMSO-*d*<sub>6</sub>, 500 MHz,  $\delta$  in ppm) spectra of Boc-Leu-Aib-OH

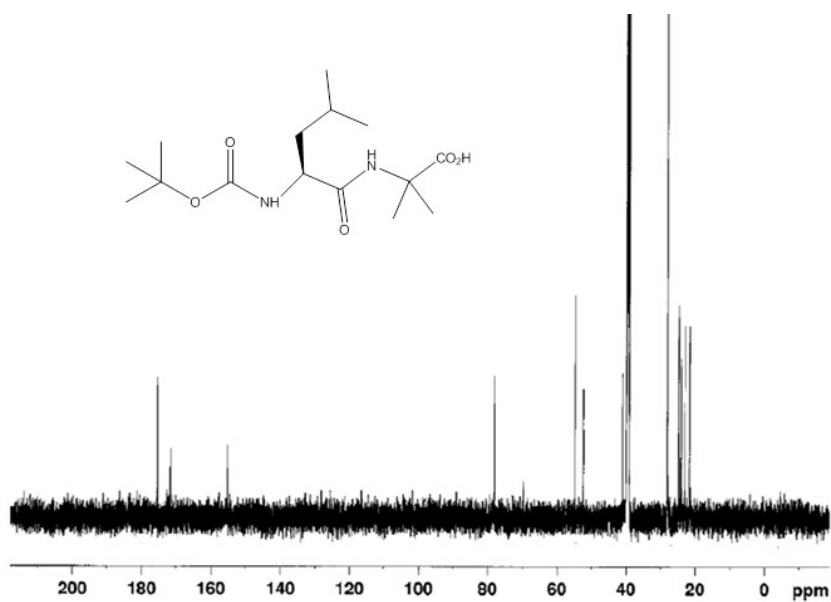

**Figure S17:** <sup>13</sup>C NMR (DMSO-*d*<sub>6</sub>, 125 MHz,  $\delta$  in ppm) spectra of Boc-Leu-Aib-OH

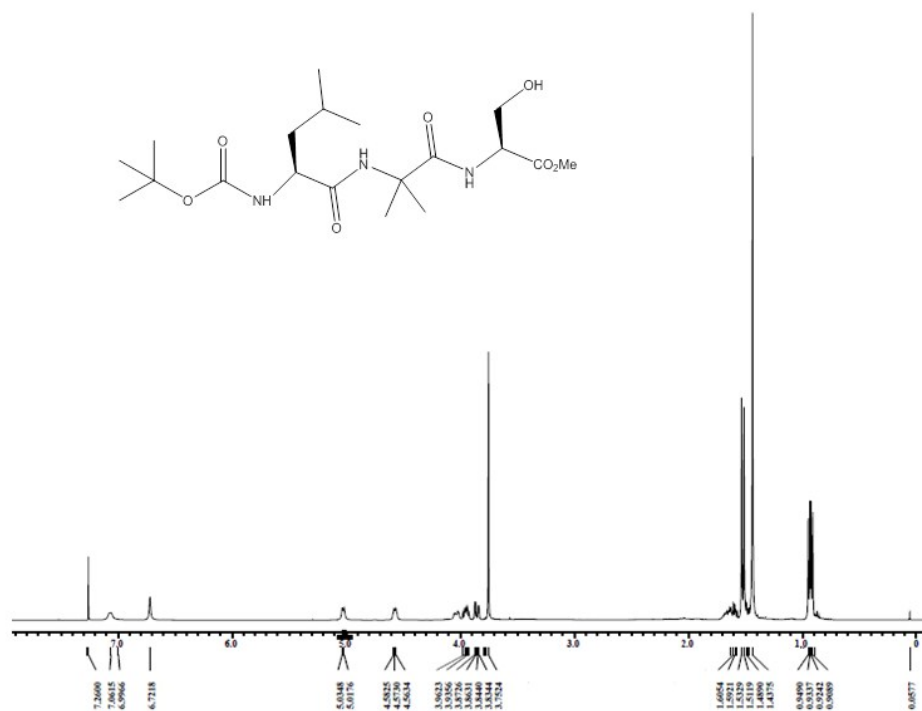

**Figure S18:** <sup>1</sup>H NMR (CDCl<sub>3</sub>, 500 MHz, δ in ppm) spectra of Boc-Leu-Aib-Ser-OMe

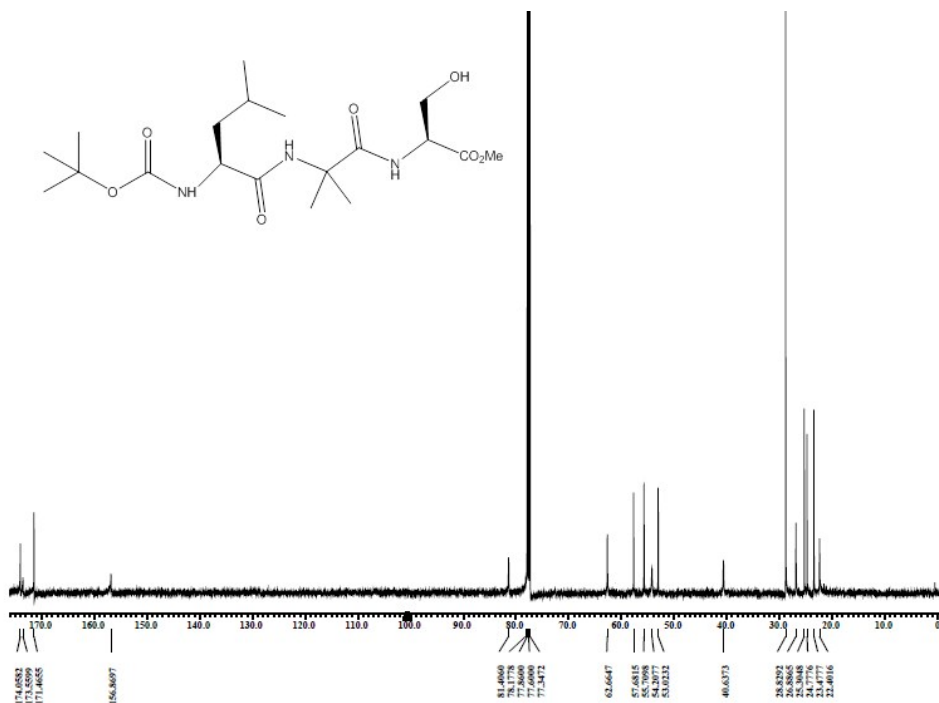

**Figure S19:** <sup>13</sup>C NMR (CDCl<sub>3</sub>, 125 MHz, δ in ppm) spectra of Boc-Leu-Aib-Ser-OMe

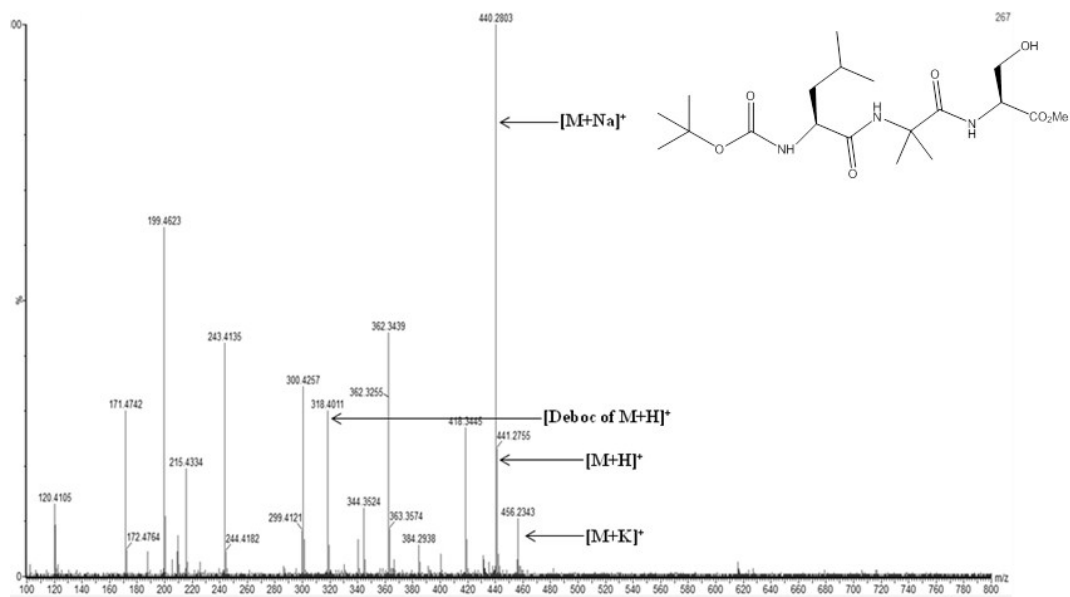

**Figure S20:** Mass spectra of Boc-Leu-Aib-Ser-OMe

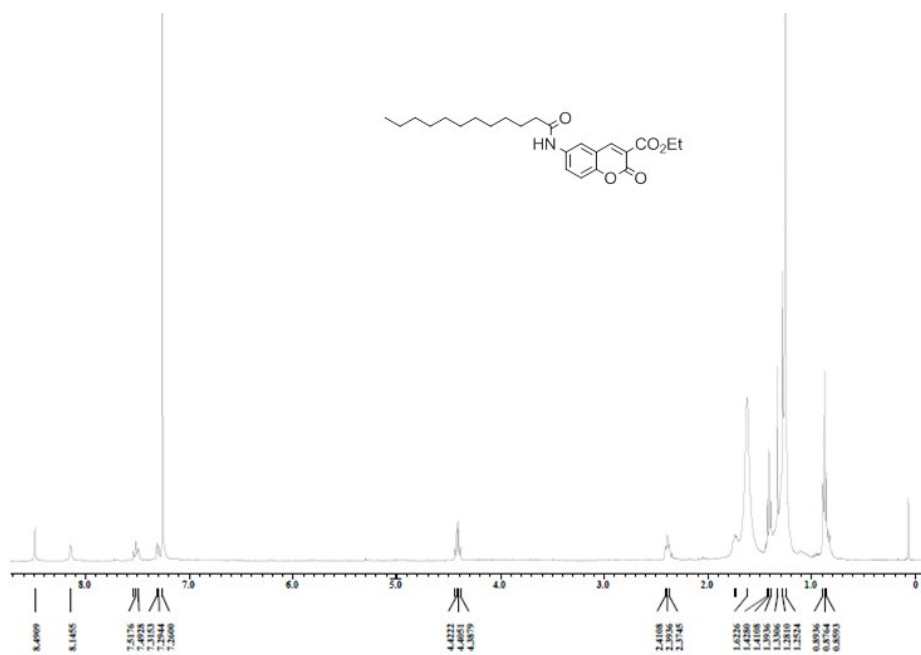

**Figure S21:** <sup>1</sup>H NMR (CDCl<sub>3</sub>, 500 MHz, δ in ppm) spectra of Coumarin Derivative

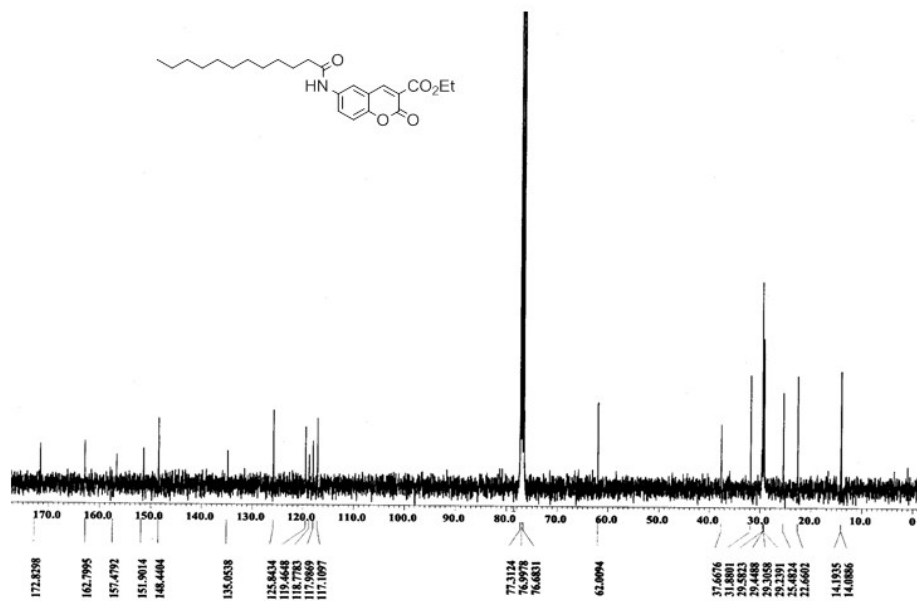

**Figure S22:**  $^{13}\text{C}$  NMR (CDCl<sub>3</sub>, 125 MHz,  $\delta$  in ppm) spectra of Coumarin Derivative

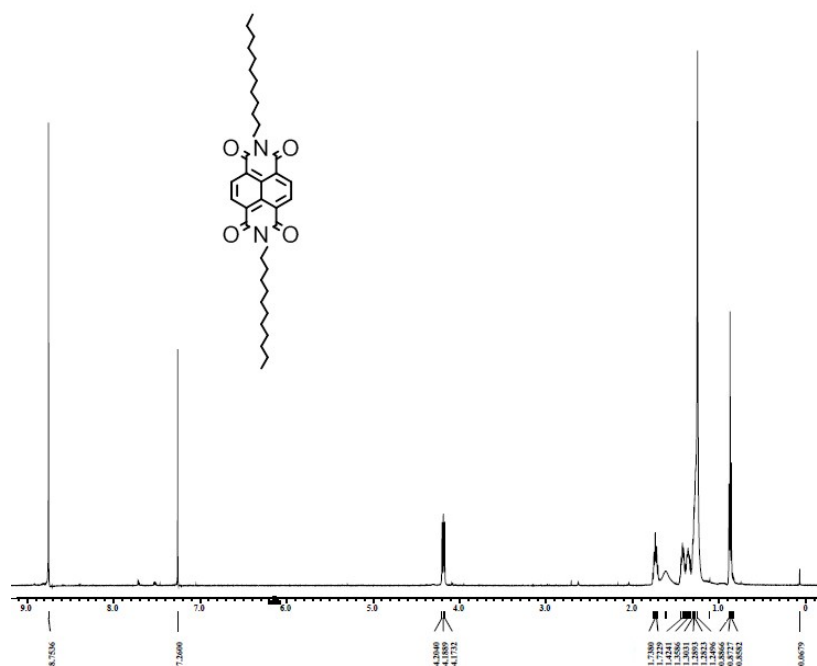

**Figure S23:**  $^1\text{H}$  NMR (CDCl<sub>3</sub>, 500 MHz,  $\delta$  in ppm) spectra of naphthalene diimide **3**.

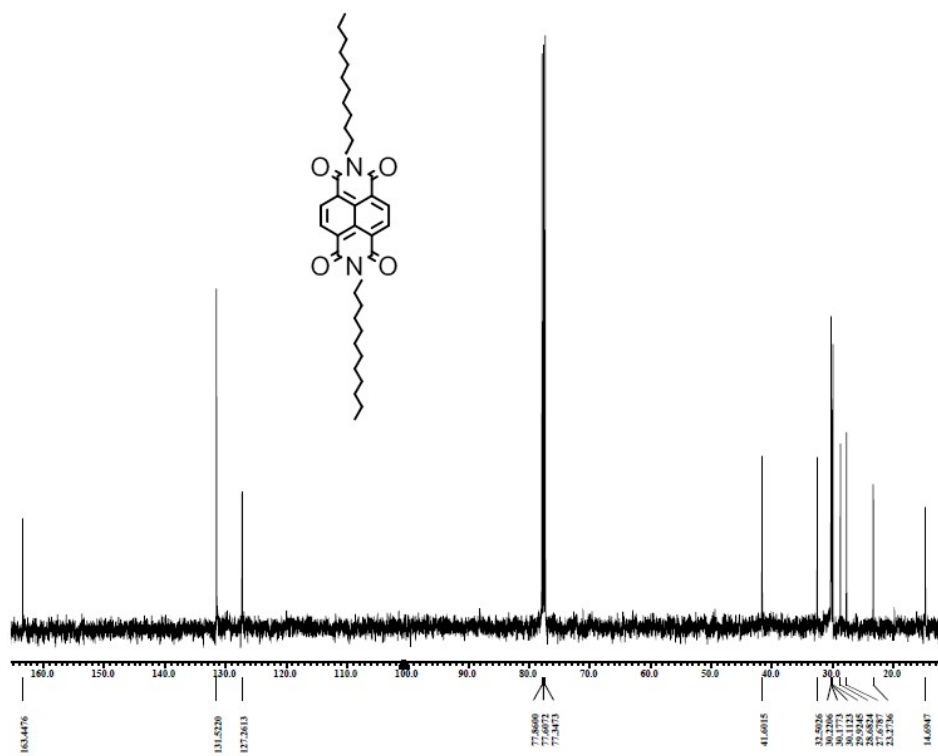

**Figure S24:**  $^{13}\text{C}$  NMR ( $\text{CDCl}_3$ , 125 MHz,  $\delta$  in ppm) spectra of naphthalene diimide **3**



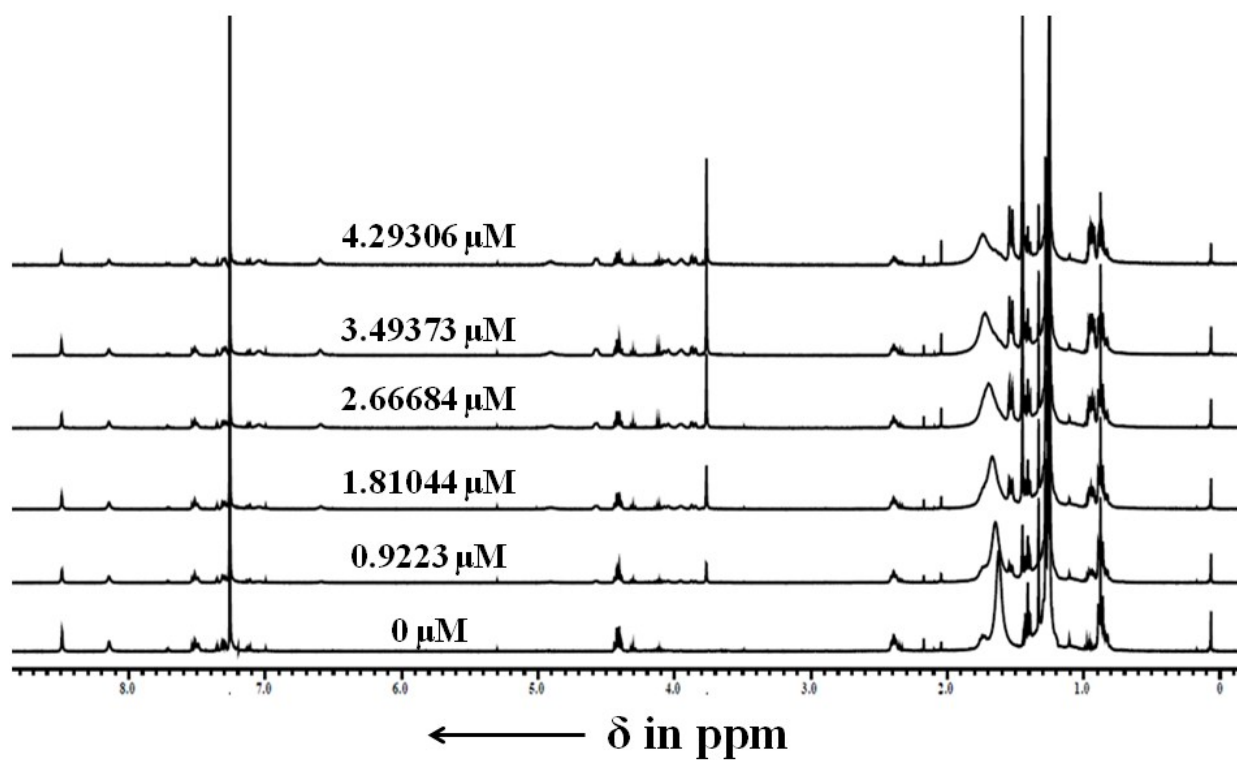

**Figure S25:** Plot of <sup>1</sup>H NMR spectra of coumarin derivative **2** with increasing amount of peptide **1** in CDCl<sub>3</sub>.

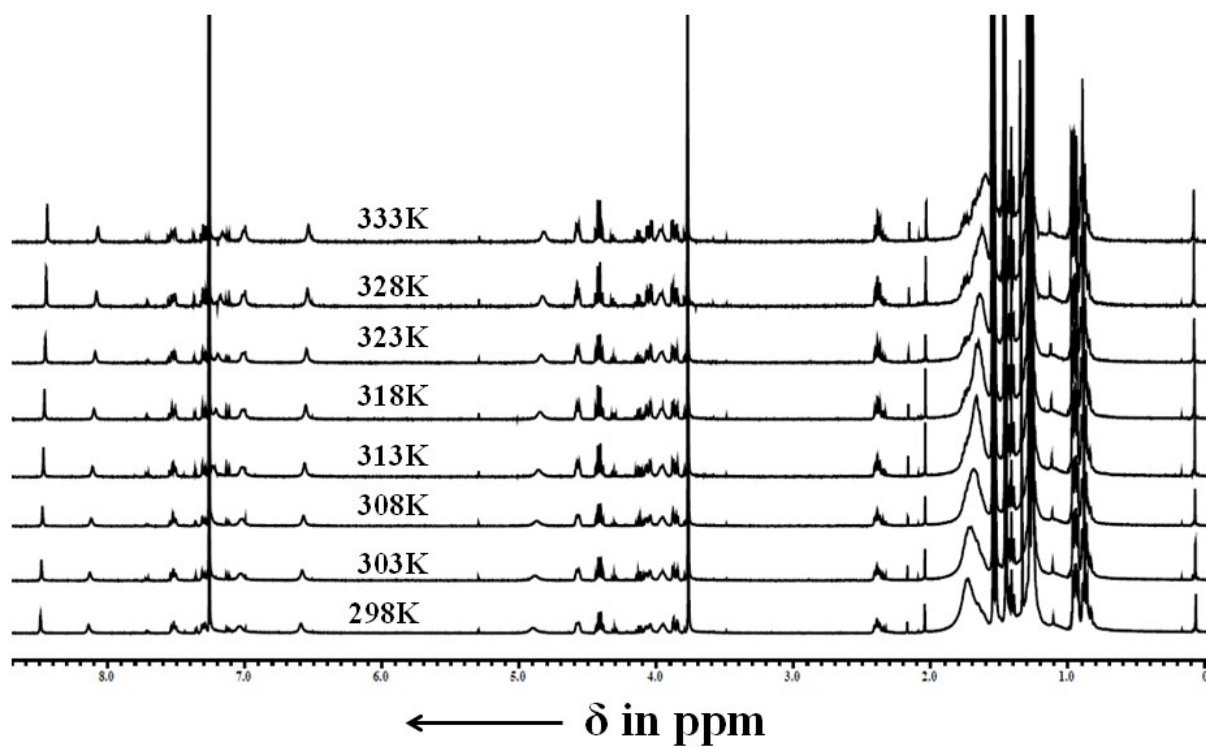

**Figure S26:** Plot of the variable temperature <sup>1</sup>H NMR spectra of coumarin derivative **2** and peptide **1** (4.29 μM) in CDCl<sub>3</sub>.

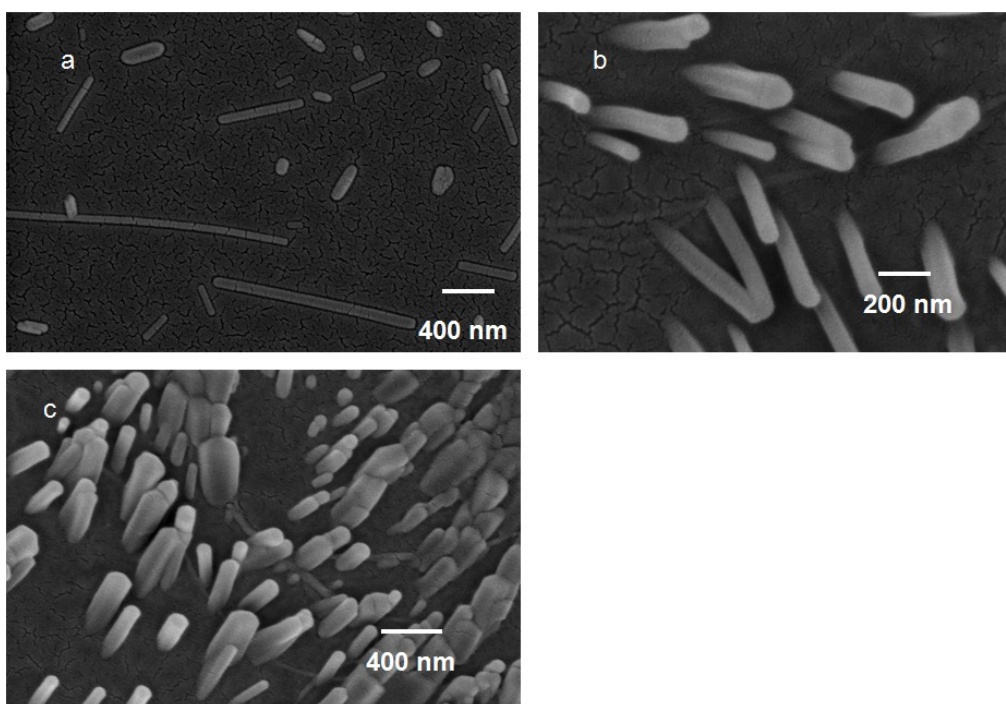

**Figure S27:** (a) FE-SEM image of peptide **1** showing unbranched polydisperse modular nanotubes morphology. (b) and (c) The unbranched polydisperse columnar morphology of peptide **1** and coumarin derivative **2** mixture.

**Sample Name:** LAS 104 1  
**SOP Name:** mansettings.nano  
**File Name:** LAS 104.dts  
**Record Number:** 1  
**Material RI:** 1.59  
**Material Absorbion:** 0.010  
**Dispersant Name:** Dichloromethane  
**Dispersant RI:** 1.424  
**Viscosity (cP):** 0.4130  
**Measurement Date and Time:** 16 March 2016 10:36:54  
**Temperature (°C):** 25.0  
**Count Rate (kcps):** 189.8  
**Cell Description:** Glass cuvette with square aperture  
**Duration Used (s):** 30  
**Measurement Position (mm):** 4.65  
**Attenuator:** 11

|                               | Size (d.nm):         | % Intensity: | St Dev (d.nm): |
|-------------------------------|----------------------|--------------|----------------|
| <b>Z-Average (d.nm):</b> 1448 | <b>Peak 1:</b> 59.73 | 100.0        | 7.538          |
| <b>Pdi:</b> 1.000             | <b>Peak 2:</b> 0.000 | 0.0          | 0.000          |
| <b>Intercept:</b> 0.375       | <b>Peak 3:</b> 0.000 | 0.0          | 0.000          |

**Result quality :** Refer to quality report

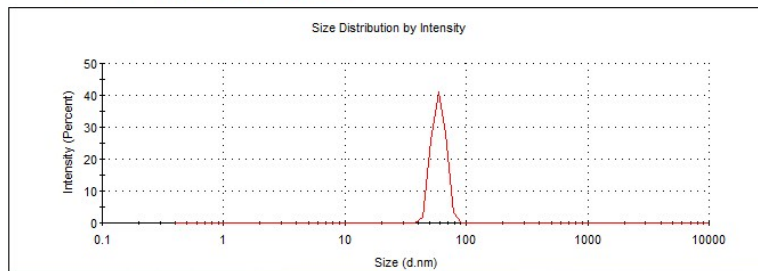

**Figure S28:** DLS data of peptide 1.

**Sample Name:** Cou104 1  
**SOP Name:** mansettings.nano  
**File Name:** Cou104.dts  
**Record Number:** 1  
**Material RI:** 1.59  
**Material Absorbion:** 0.010  
**Dispersant Name:** Dichloromethane  
**Dispersant RI:** 1.424  
**Viscosity (cP):** 0.4130  
**Measurement Date and Time:** 16 March 2016 10:45:16  
**Temperature (°C):** 25.0  
**Count Rate (kcps):** 182.3  
**Cell Description:** Glass cuvette with square aperture  
**Duration Used (s):** 30  
**Measurement Position (mm):** 4.65  
**Attenuator:** 11

|                               | Size (d.nm):         | % Intensity: | St Dev (d.nm): |
|-------------------------------|----------------------|--------------|----------------|
| <b>Z-Average (d.nm):</b> 2296 | <b>Peak 1:</b> 65.47 | 100.0        | 9.785          |
| <b>Pdi:</b> 0.998             | <b>Peak 2:</b> 0.000 | 0.0          | 0.000          |
| <b>Intercept:</b> 0.371       | <b>Peak 3:</b> 0.000 | 0.0          | 0.000          |

**Result quality :** Refer to quality report

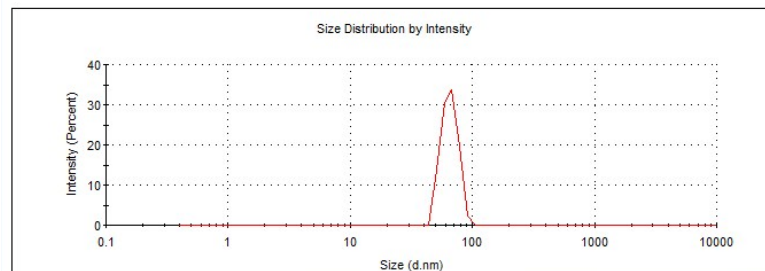

**Figure S29:** DLS data of coumarin 2.

**Sample Name:** NDI 104 1  
**SOP Name:** mansettings.nano  
**File Name:** NDI 104.dts  
**Record Number:** 1  
**Material RI:** 1.59  
**Material Absorbtion:** 0.010

**Dispersant Name:** Dichloromethane  
**Dispersant RI:** 1.424  
**Viscosity (cP):** 0.4130  
**Measurement Date and Time:** 16 March 2016 10:53:11

**Temperature (°C):** 25.0  
**Count Rate (kcps):** 265.9  
**Cell Description:** Glass cuvette with square aperture

**Duration Used (s):** 30  
**Measurement Position (mm):** 4.65  
**Attenuator:** 11

|                               | Size (d.nm):         | % Intensity: | St Dev (d.nm): |
|-------------------------------|----------------------|--------------|----------------|
| <b>Z-Average (d.nm):</b> 1435 | <b>Peak 1:</b> 209.6 | 100.0        | 34.89          |
| <b>Pdl:</b> 0.632             | <b>Peak 2:</b> 0.000 | 0.0          | 0.000          |
| <b>Intercept:</b> 0.464       | <b>Peak 3:</b> 0.000 | 0.0          | 0.000          |

**Result quality :** Refer to quality report

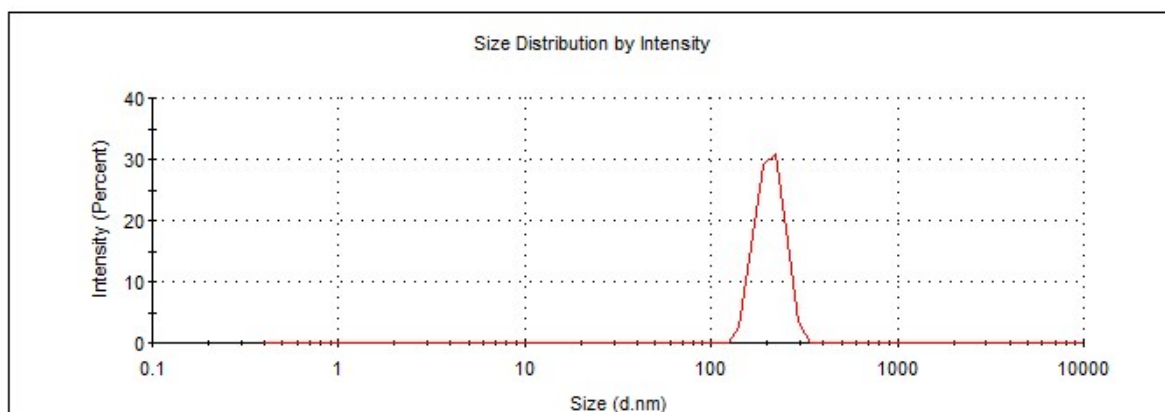

**Figure S30:** DLS data of diimide 3.

**Sample Name:** LAScou4 1  
**SOP Name:** mansettings.nano  
**File Name:** LAScou4.dts  
**Record Number:** 1  
**Material RI:** 1.59  
**Material Absorbtion:** 0.010  
**Dispersant Name:** Dichloromethane  
**Dispersant RI:** 1.424  
**Viscosity (cP):** 0.4130  
**Measurement Date and Time:** 14 March 2016 20:17:49

**Temperature (°C):** 25.0  
**Count Rate (kcps):** 99.2  
**Cell Description:** Glass cuvette with square aperture  
**Duration Used (s):** 30  
**Measurement Position (mm):** 4.65  
**Attenuator:** 10

|                               | Size (d.nm):         | % Intensity: | St Dev (d.nm): |
|-------------------------------|----------------------|--------------|----------------|
| <b>Z-Average (d.nm):</b> 2896 | <b>Peak 1:</b> 251.2 | 100.0        | 26.95          |
| <b>Pdl:</b> 0.870             | <b>Peak 2:</b> 0.000 | 0.0          | 0.000          |
| <b>Intercept:</b> 0.580       | <b>Peak 3:</b> 0.000 | 0.0          | 0.000          |

**Result quality :** Refer to quality report

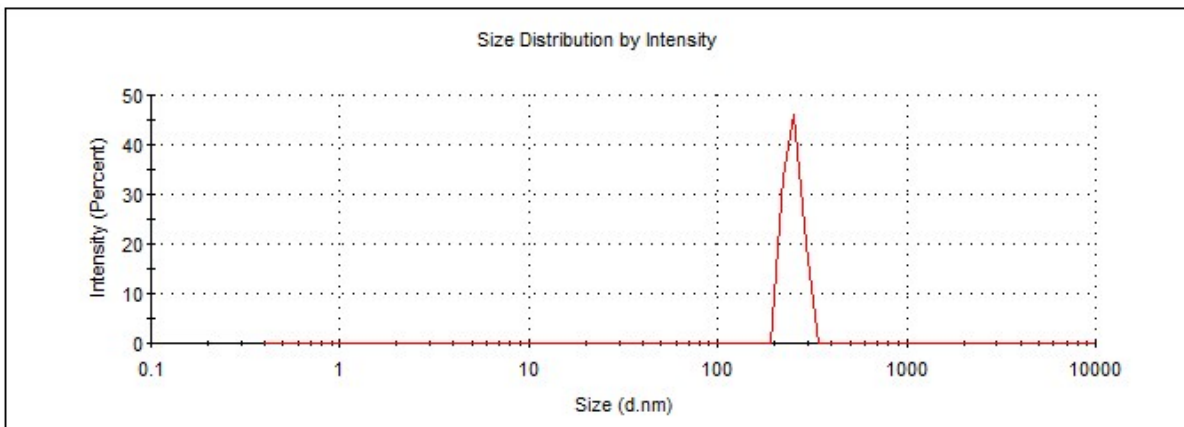

**Figure S31:** DLS data of mixture of peptide 1 and coumarin 2.

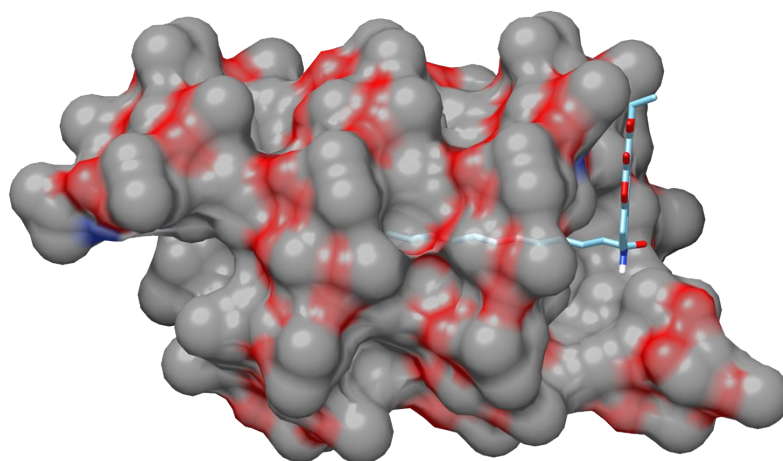

```
Detected 4 CPUs  
Reading input ... done.  
Setting up the scoring function ... done.  
Analyzing the binding site ... done.  
Using random seed: -764819232  
Performing search ... done.  
Refining results ... done.
```

| mode | affinity<br>(kcal/mol) | dist from best mode<br>rmsd l.b. | rmsd u.b. |
|------|------------------------|----------------------------------|-----------|
| 3    | -9.9                   | 3.586                            | 4.649     |

**Figure S32:** The docking study of peptide 1 supramolecular tube and coumarin 2.

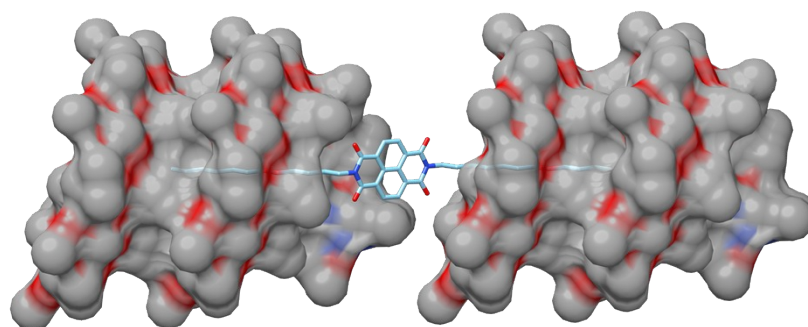

```

Detected 4 CPUs
Reading input ... done.
Setting up the scoring function ... done.
Analyzing the binding site ... done.
Using random seed: -1192870512
Performing search ... done.
Refining results ... done.

```

| mode | affinity<br>(kcal/mol) | dist from best mode |           |
|------|------------------------|---------------------|-----------|
|      |                        | rmsd l.b.           | rmsd u.b. |
| 4    | -6.9                   | 1.255               | 1.313     |

**Figure S33:** The docking study of peptide 1 supramolecular tube and diimide 3.

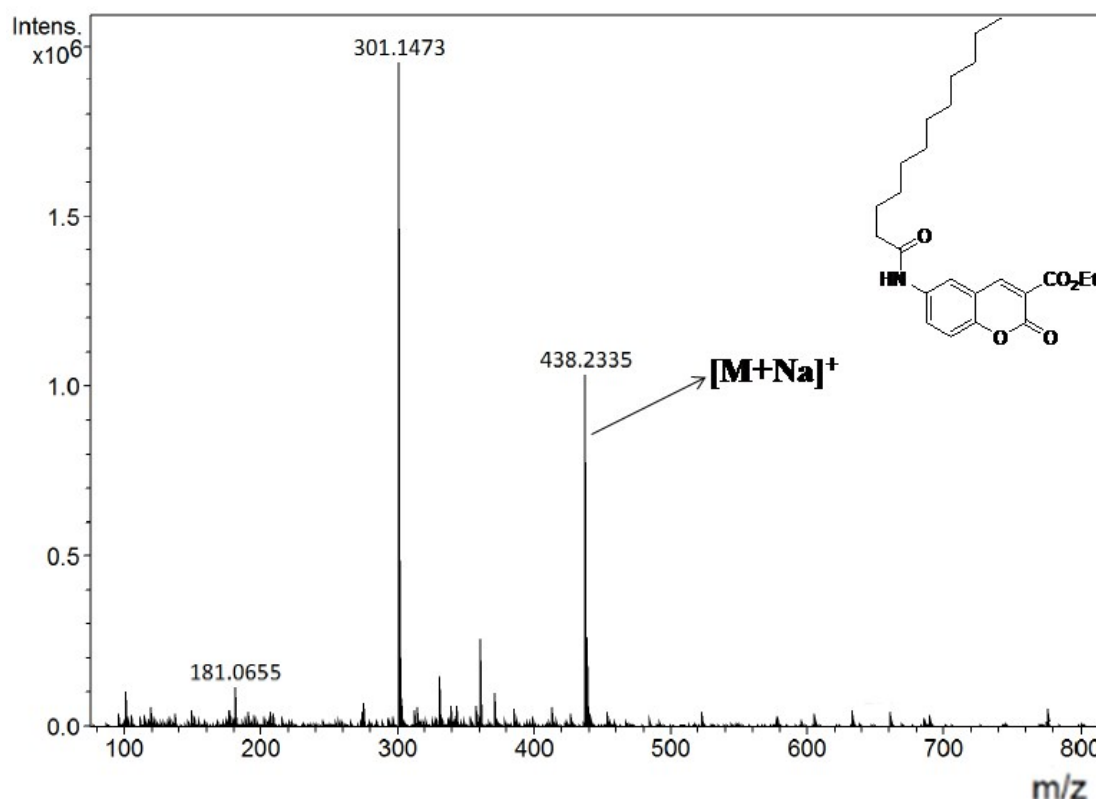

**Figure S34:** The mass data of coumarin 2.



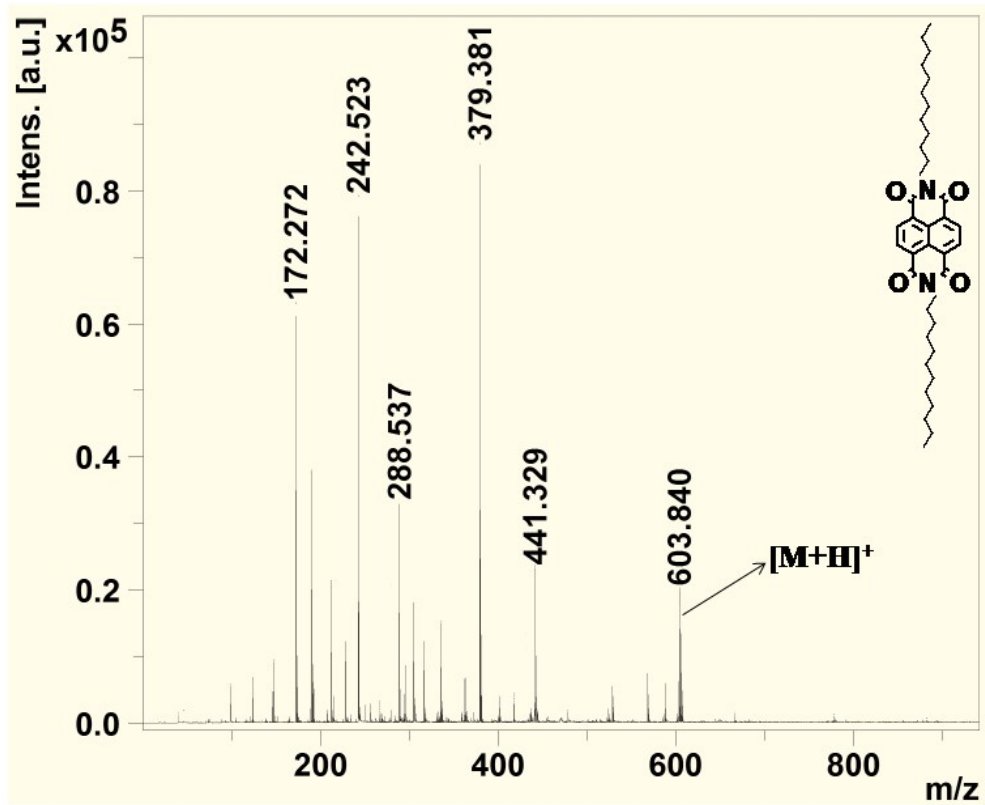

Figure S35: The mass data of diimide 3.
